# Supplementary material for: EBV Impact in Peripheral Macrophages’ Polarization Cytokines in Pediatric Patients
Source: MDPI journal article supplement (doi:10.3390/v15102105), 2023-10-17
Supplement: s1 [file s1]

|                    | EBERs | LMP1 | EBNA2 | BMRF1 |
|--------------------|-------|------|-------|-------|
| <i>Latency 0</i>   | -     | -    | -     | +/-   |
| <i>Latency I</i>   | +     | -    | -     | +/-   |
| <i>Latency II</i>  | +     | +    | -     | +/-   |
| <i>Latency III</i> | +     | +    | +     | +/-   |
| <i>Lytic Cycle</i> | +/-   | +/-  | +/-   | +     |

Supplementary Table S3. Latency Patterns definition by IHQ. Latency 0 was defined as: EBERs-/LMP1-/EBNA2-; Latency I as: EBERs+/LMP1-/EBNA2-; Latency II as: EBERs+/LMP1+/EBNA2-; and Latency III as: EBERs+/LMP1+/EBNA2+
