# Supplementary material for: EBV Impact in Peripheral Macrophages’ Polarization Cytokines in Pediatric Patients
Source: MDPI journal article supplement (doi:10.3390/v15102105), 2023-10-17
Supplement: s1 [file s1]

|                              | VCA IgM | VCA IgG<br>1/10, 1/40, 1/320 | EA IgG | EBNA1 IgG |
|------------------------------|---------|------------------------------|--------|-----------|
| <i>Primary Infected (PI)</i> | +       | -/+                          | -/+    | -         |
| <i>Healthy Carrier (HC)</i>  | -       | +                            | -      | +         |
| <i>Reactivation (R)</i>      | -/+     | +                            | +      | +         |
| <i>Not Infected (NI)</i>     | -       | -                            | -      | -         |

Supplementary Table S1. Infectious status definition by serology. Primary infected patients (PI) were defined as VCA-IgM+/VCA-IgG-/EA-IgG-/EBNA1-IgG-; healthy carriers (HC) as VCA-IgM-/VCA-IgG+/EA-IgG-/EBNA1-IgG+; patients undergoing viral reactivation (R) were defined as VCA-IgM+/-/VCA-IgG+/EA-IgG+/EBNA1-IgG+; and non-infected patients (NI) as VCA-IgM-/VCA-IgG-/EA-IgG-/EBNA1-IgG-
