# Supplementary material for: EBV Impact in Peripheral Macrophages’ Polarization Cytokines in Pediatric Patients
Source: MDPI journal article supplement (doi:10.3390/v15102105), 2023-10-17
Supplement: s1 [file s1]

|                              | Sex | Age |
|------------------------------|-----|-----|
| <i>Primary Infected (PI)</i> | F   | 4   |
|                              | M   | 12  |
|                              | M   | 3   |
|                              | F   | 10  |
|                              | F   | 10  |
|                              | F   | 6   |
|                              | M   | 2   |
|                              | M   | 8   |
|                              | M   | 4   |
|                              | M   | 3   |
|                              | M   | 3   |
|                              | F   | 5   |
|                              | F   | 4   |
|                              | F   | 11  |
|                              | F   | 5   |
|                              | M   | 2   |
|                              | M   | 6   |
|                              | M   | 12  |
|                              | F   | 9   |
|                              | M   | 8   |
|                              | M   | 7   |
|                              | M   | 2   |
| <i>Healthy Carrier (HC)</i>  | F   | 7   |
|                              | F   | 2   |
|                              | M   | 4   |
|                              | F   | 6   |
|                              | F   | 12  |
|                              | F   | 8   |
|                              | F   | 15  |
|                              | M   | 8   |
|                              | F   | 3   |
|                              | F   | 5   |
|                              | M   | 11  |
|                              | F   | 3   |
|                              | F   | 4   |
|                              | M   | 6   |
|                              | F   | 3   |
|                              | F   | 13  |
|                              | M   | 3   |
|                              | M   | 9   |
|                              | M   | 7   |
|                              | M   | 4   |
|                              | M   | 7   |

|                          |   |    |
|--------------------------|---|----|
| <i>Reactivation (R)</i>  | M | 5  |
|                          | M | 8  |
|                          | M | 2  |
|                          | M | 2  |
|                          | M | 8  |
|                          | F | 5  |
|                          | F | 3  |
|                          | F | 2  |
|                          | M | 6  |
|                          | M | 11 |
|                          | M | 2  |
| <i>Not Infected (NI)</i> | F | 1  |
|                          | F | 1  |
|                          | F | 11 |
|                          | F | 2  |
|                          | M | 2  |

Supplementary Table S2. Detail of Age and sex in infectious status.
